# Supplementary material for: External validation of the intensive care national audit & research centre (ICNARC) risk prediction model in critical care units in Scotland
Source: PubMed Central journal article supplement (PMC4277842; doi:10.1186/1471-2253-14-116), 2014-12-15
Supplement: 12871_2014_323_MOESM1_ESM.pdf [file 12871_2014_323_MOESM1_ESM.pdf]

## **Additional file 1 - Scottish Intensive Care Society diagnoses that were unable to be mapped to the ICNARC Coding Method**

- Disseminated malignancy
- Endoscopy
- Interventional radiology
- Interventional radiology/cardiology
- MRSA
- Massive blood loss/transfusion without shock
- Massive blood transfusion
- Multiple surgical procedures
- Other anaesthetic complication
- Other chronic physical disorder
- Other drug related problem
- Other infection
- Other surgery
- Other trauma
- Pre-op assessment/monitoring/optimisation
- Self-inflicted injury
- Surgical complication
- Systemic embolism
- VRE
